# Supplementary material for: The Missing Piece in Biosynthesis of Amphidinols: First Evidence of Glycolate as a Starter Unit in New Polyketides from Amphidinium carterae
Source: PubMed Central journal article supplement (PMC5484107; doi:10.3390/md15060157), 2017-05-31
Supplement: marinedrugs-15-00157-s001.pdf [file marinedrugs-15-00157-s001.pdf]

# Supplementary Materials: The Missing Piece in Biosynthesis of Amphidinols: First Evidence of Glycolate as a Starter Unit in New Polyketides from *Amphidinium carterae*

Adele Cutignano, Genoveffa Nuzzo, Angela Sardo and Angelo Fontana

**Figure S1.**  $^1\text{H}$  NMR spectrum (600 MHz,  $\text{CD}_3\text{OD}/\text{C}_5\text{D}_5\text{N}$  2:1) of **1**.

**Figure S2.**  $^{13}\text{C}$  NMR spectrum (600 MHz,  $\text{CD}_3\text{OD}/\text{C}_5\text{D}_5\text{N}$  2:1) of **1**.

**Figure S3.**  $^{13}\text{C}$  Jmod spectrum (600 MHz,  $\text{CD}_3\text{OD}/\text{C}_5\text{D}_5\text{N}$  2:1) of **1**.

**Figure S4.**  $^1\text{H}$ - $^1\text{H}$  COSY spectrum (600 MHz,  $\text{CD}_3\text{OD}/\text{C}_5\text{D}_5\text{N}$  2:1) of **1**.

**Figure S5.** TOCSY spectrum (600 MHz,  $\text{CD}_3\text{OD}/\text{C}_5\text{D}_5\text{N}$  2:1) of **1**.

**Figure S6.** edHSQC spectrum (600 MHz,  $\text{CD}_3\text{OD}/\text{C}_5\text{D}_5\text{N}$  2:1) of **1**.

**Figure S7.** HMBC ( $J = 7$  Hz) spectrum (600 MHz,  $\text{CD}_3\text{OD}/\text{C}_5\text{D}_5\text{N}$  2:1) of **1**.

**Figure S8.** NOESY (600 MHz,  $\text{CD}_3\text{OD}/\text{C}_5\text{D}_5\text{N}$  2:1) of **1**.

**Figure S9.**  $^1\text{H}$  NMR spectrum (600 MHz,  $\text{CD}_3\text{OD}$ ) of **2**.

**Figure S10.**  $^{13}\text{C}$  Jmod spectrum (600 MHz,  $\text{CD}_3\text{OD}$ ) of **2**.

**Figure S11.**  $^1\text{H}$ - $^1\text{H}$  COSY spectrum (600 MHz,  $\text{CD}_3\text{OD}$ ) of **2**.

**Figure S12.** TOCSY spectrum (600 MHz,  $\text{CD}_3\text{OD}$ ) of **2**.

**Figure S13.** edHSQC spectrum (600 MHz,  $\text{CD}_3\text{OD}$ ) of **2**.

**Figure S14.** HMBC ( $J = 7$  Hz) spectrum in  $\text{CD}_3\text{OD}$  (600 MHz) of **2**.

**Figure S15.**  $^{13}\text{C}$  NMR spectrum (600 MHz,  $\text{CD}_3\text{OD}/\text{C}_5\text{D}_5\text{N}$  2:1) of **1** from the experiment with  $[1-^{13}\text{C}]$ -acetate.

**Figure S16.**  $^{13}\text{C}$  NMR spectrum (600 MHz,  $\text{CD}_3\text{OD}/\text{C}_5\text{D}_5\text{N}$  2:1) of **1** from the experiment with  $[2-^{13}\text{C}]$ -acetate.

**Figure S17.**  $^{13}\text{C}$  NMR spectrum (600 MHz,  $\text{CD}_3\text{OD}/\text{C}_5\text{D}_5\text{N}$  2:1) of **1** from the experiment with  $[1,2-^{13}\text{C}_2]$ -acetate.

**Figure S18.**  $^{13}\text{C}$  NMR spectrum (600 MHz,  $\text{CD}_3\text{OD}/\text{C}_5\text{D}_5\text{N}$  2:1) of **1** from the experiment with  $[1-^{13}\text{C}]$ -glycolate.

**Figure S19.**  $^{13}\text{C}$  NMR spectrum (600 MHz,  $\text{CD}_3\text{OD}/\text{C}_5\text{D}_5\text{N}$  2:1) of **1** from the experiment with  $[1-^{13}\text{C}]$ -glycolate/SHAM.

**Figure S20.**  $^{13}\text{C}$  NMR spectrum (600 MHz,  $\text{CD}_3\text{OD}$ ) of **2** from the experiment with  $[1-^{13}\text{C}]$ -glycolate/SHAM.

**Figure S21.** ESI<sup>+</sup> MS/MS of **1** on molecular ion sodium adduct  $[\text{M}+\text{Na}]^+$  at  $m/z$  1361.8.

**Figure S22.** ESI<sup>-</sup> MS/MS of **2** on molecular ion  $[\text{M}-\text{H}]^-$  at  $m/z$  1417.8.

**Figure S23.** ESI<sup>+</sup> MS/MS of **2** on molecular ion sodium adduct  $[\text{M}-\text{H}+2\text{Na}]^+$  at  $m/z$  1463.8.

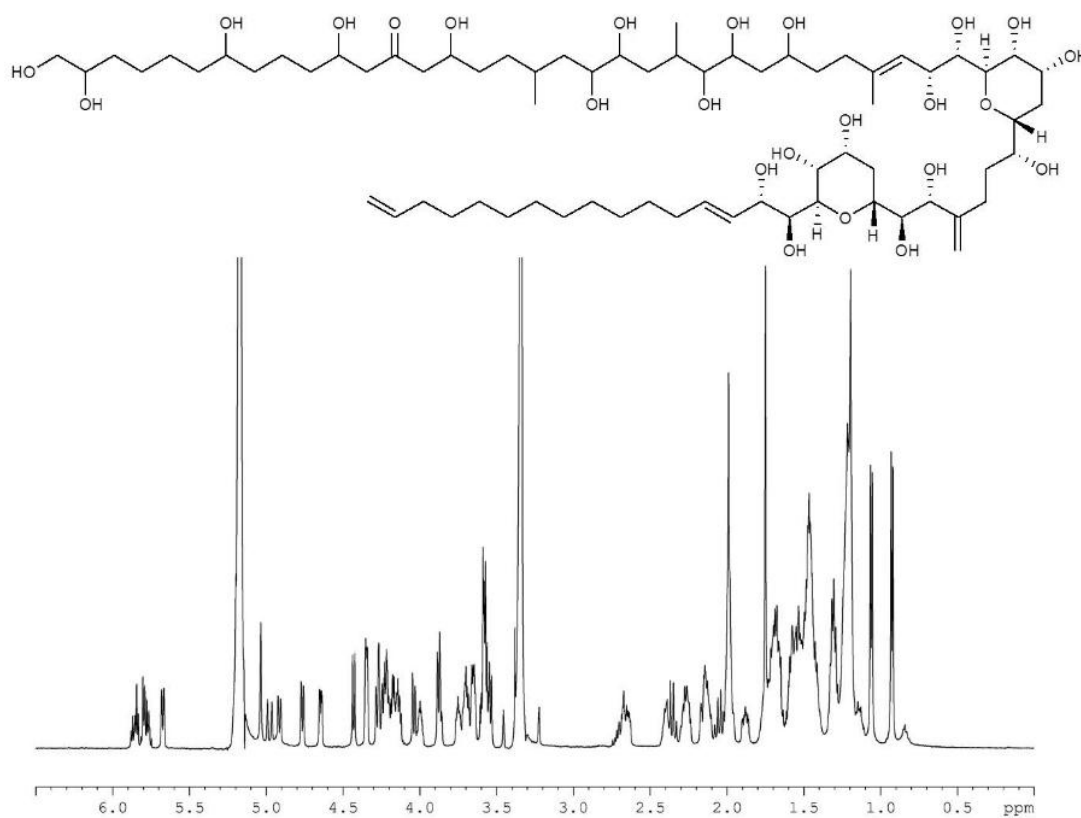

Figure S1.  $^1\text{H}$  NMR spectrum (600 MHz,  $\text{CD}_3\text{OD}/\text{C}_5\text{D}_5\text{N}$  2:1) of 1.

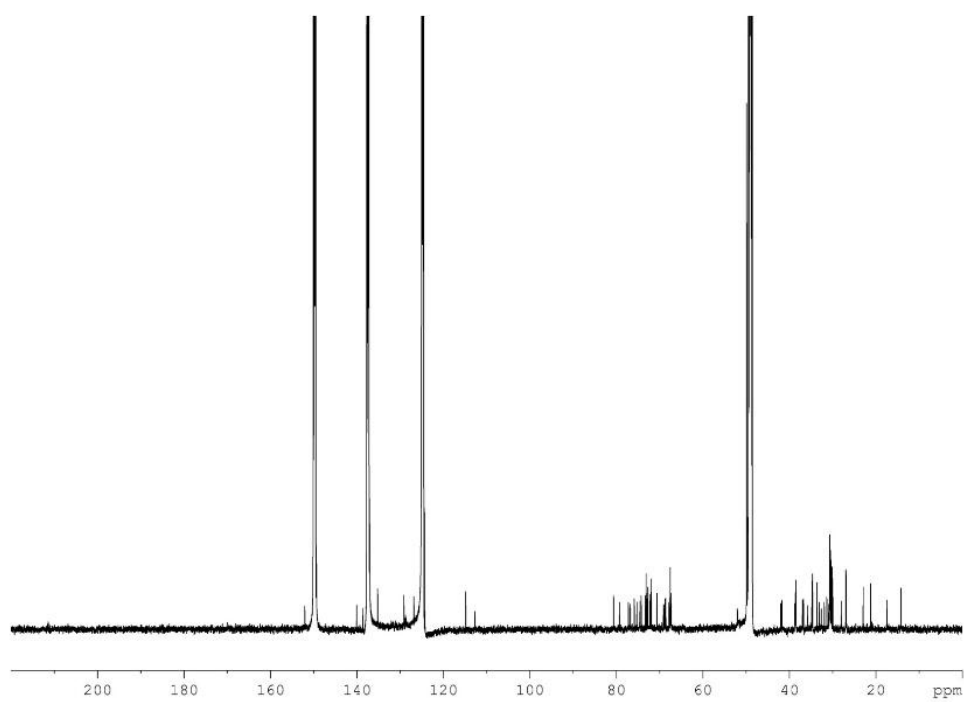

Figure S2.  $^{13}\text{C}$  NMR spectrum (600 MHz,  $\text{CD}_3\text{OD}/\text{C}_5\text{D}_5\text{N}$  2:1) of 1.

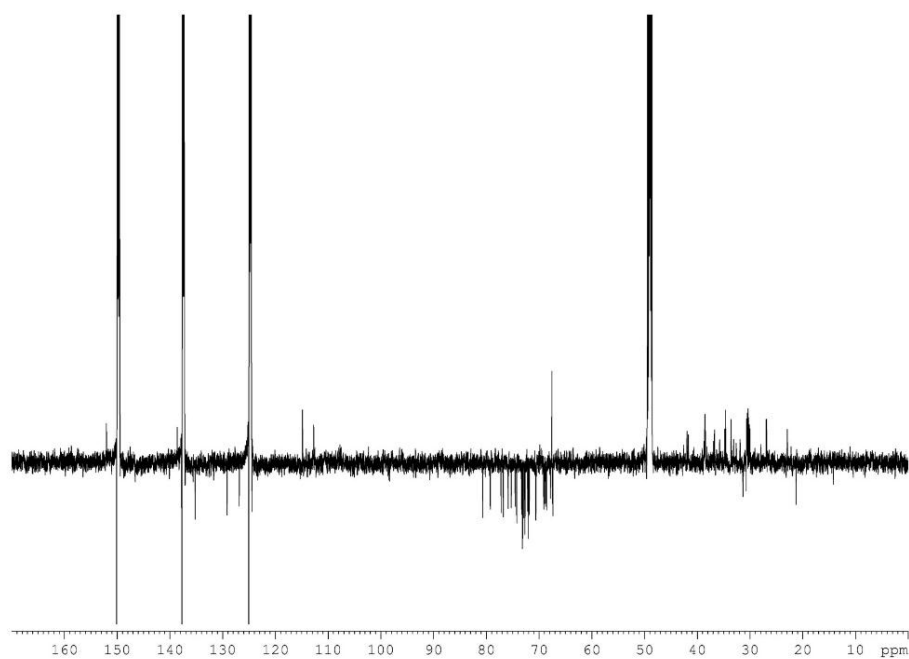

Figure S3.  $^{13}\text{C}$  Jmod spectrum (600 MHz,  $\text{CD}_3\text{OD}/\text{C}_5\text{D}_5\text{N}$  2:1) of **1**.

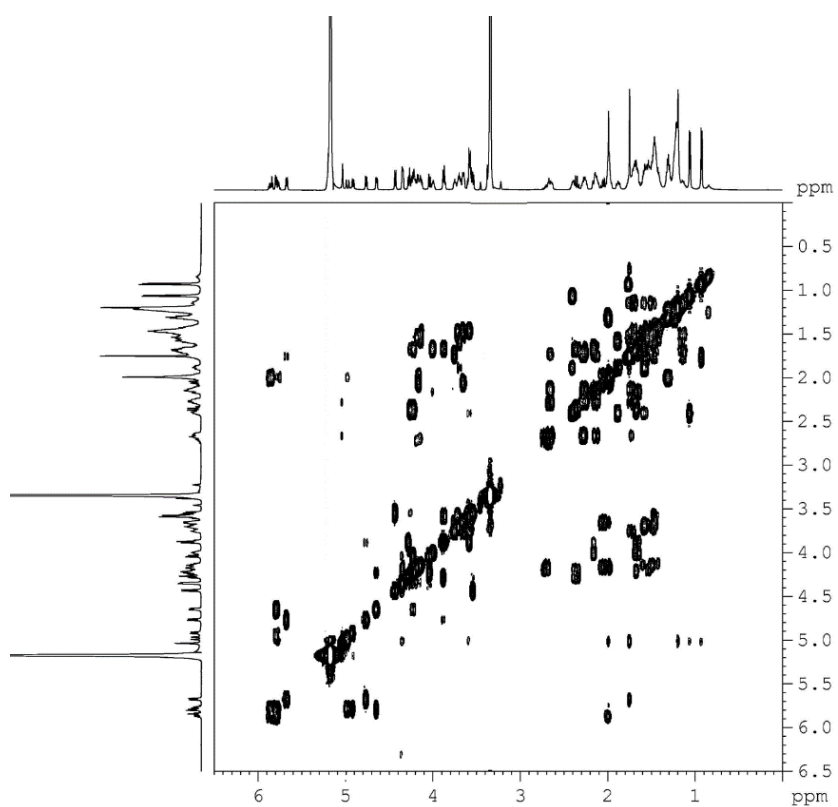

Figure S4.  $^1\text{H}$ - $^1\text{H}$  COSY spectrum (600 MHz,  $\text{CD}_3\text{OD}/\text{C}_5\text{D}_5\text{N}$  2:1) of **1**.

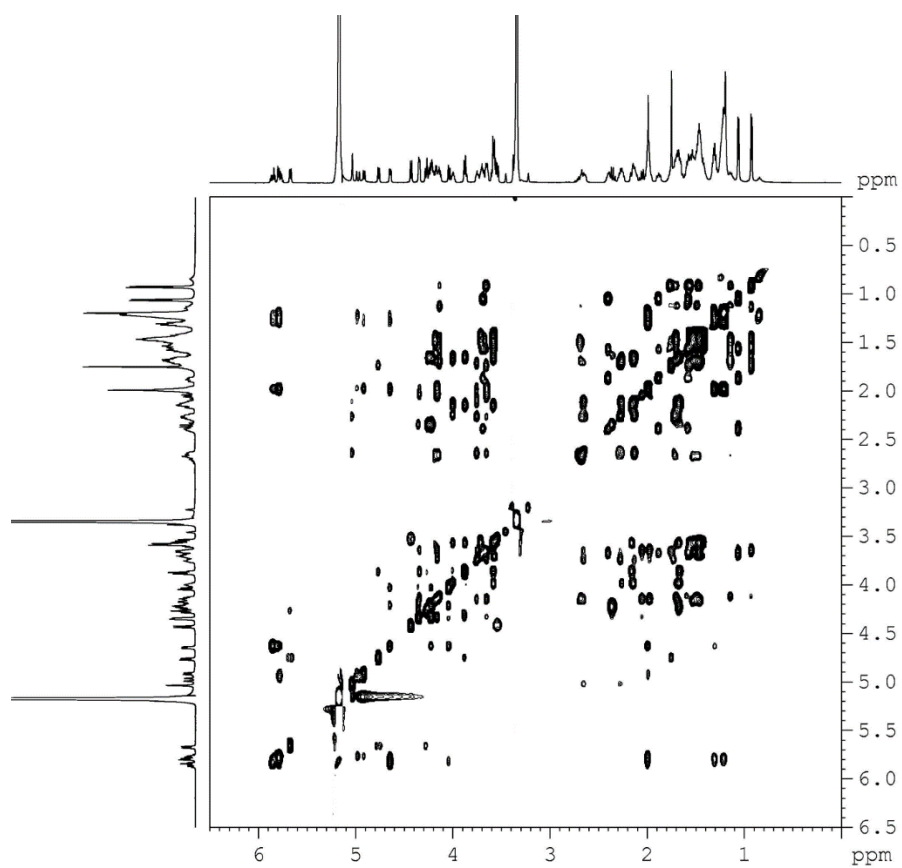

Figure S5. TOCSY spectrum (600 MHz, CD<sub>3</sub>OD/C<sub>5</sub>D<sub>5</sub>N 2:1) of **1**.

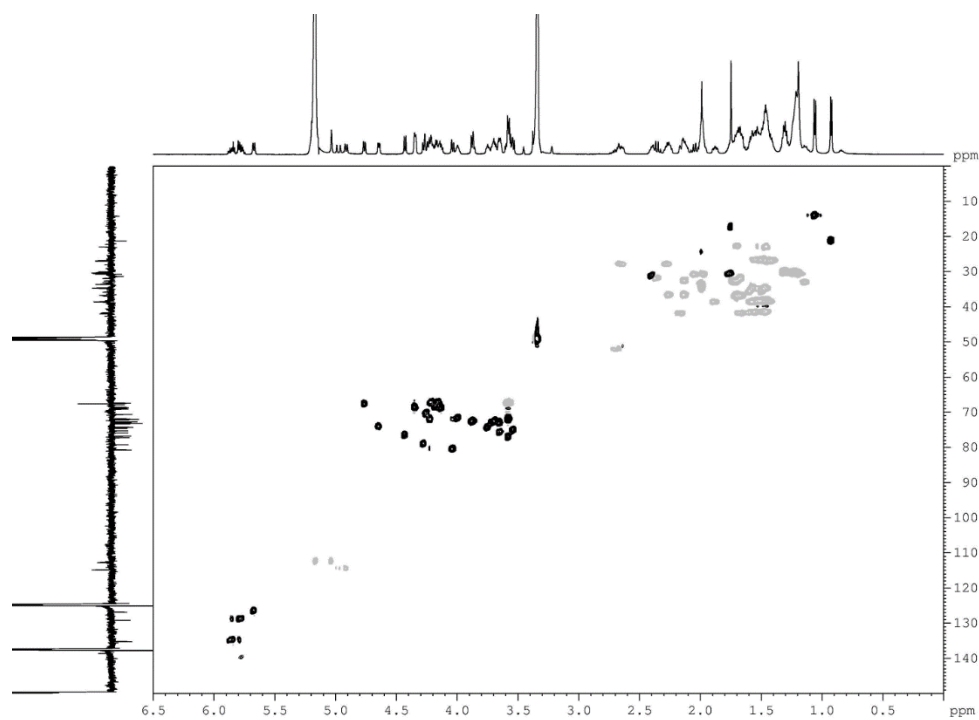

Figure S6. edHSQC spectrum (600 MHz, CD<sub>3</sub>OD/C<sub>5</sub>D<sub>5</sub>N 2:1) of **1**.

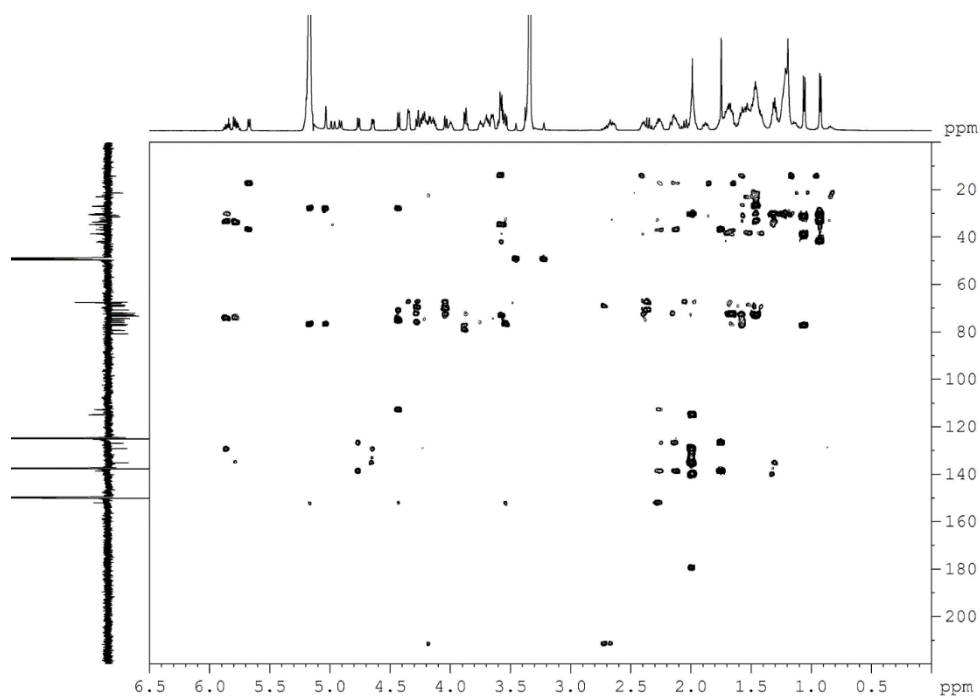

**Figure S7.** HMBC ( $J = 7$  Hz) spectrum (600 MHz,  $\text{CD}_3\text{OD}/\text{C}_5\text{D}_5\text{N}$  2:1) of **1**.

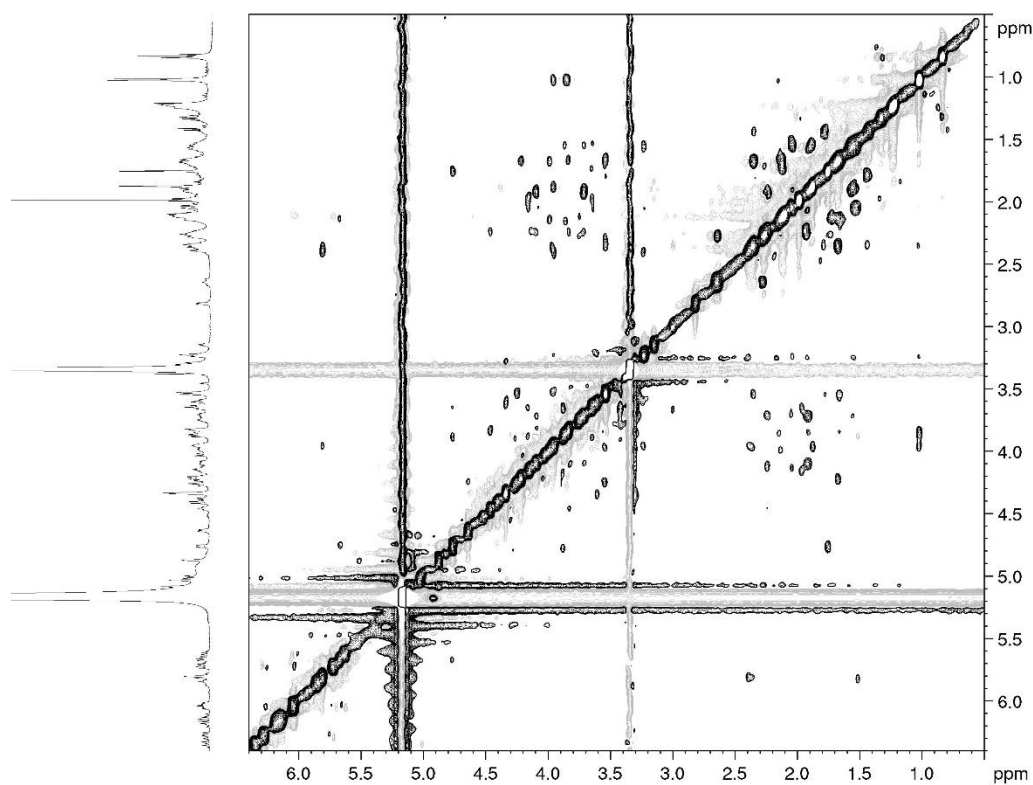

**Figure S8.** NOESY (600 MHz,  $\text{CD}_3\text{OD}/\text{C}_5\text{D}_5\text{N}$  2:1) of **1**.

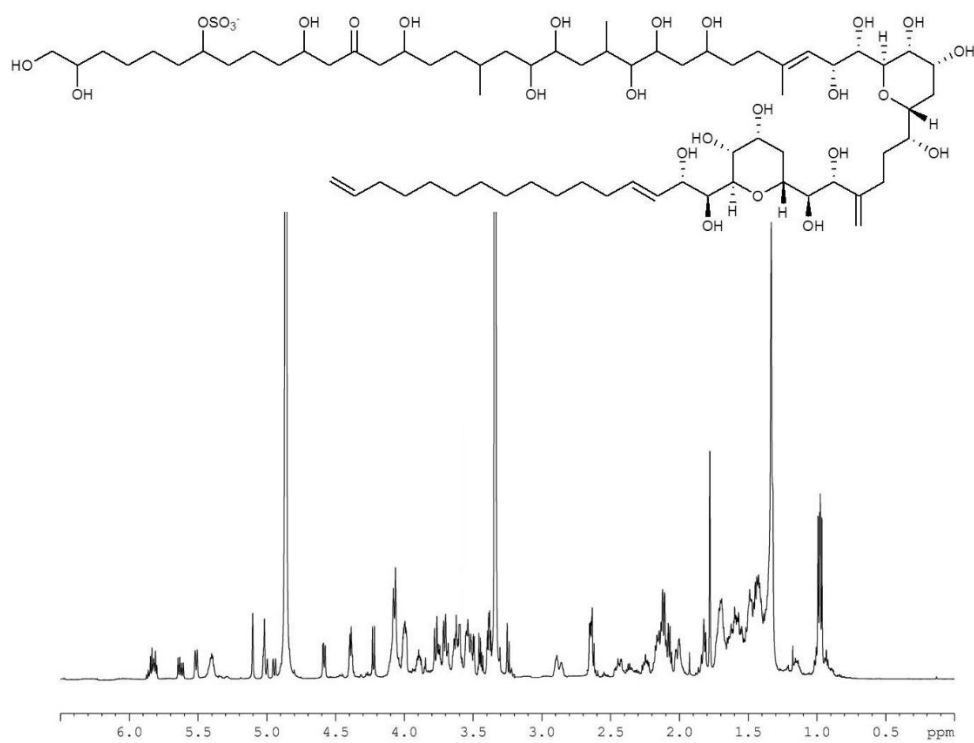

**Figure S9.** <sup>1</sup>H NMR spectrum (600 MHz, CD<sub>3</sub>OD) of 2.

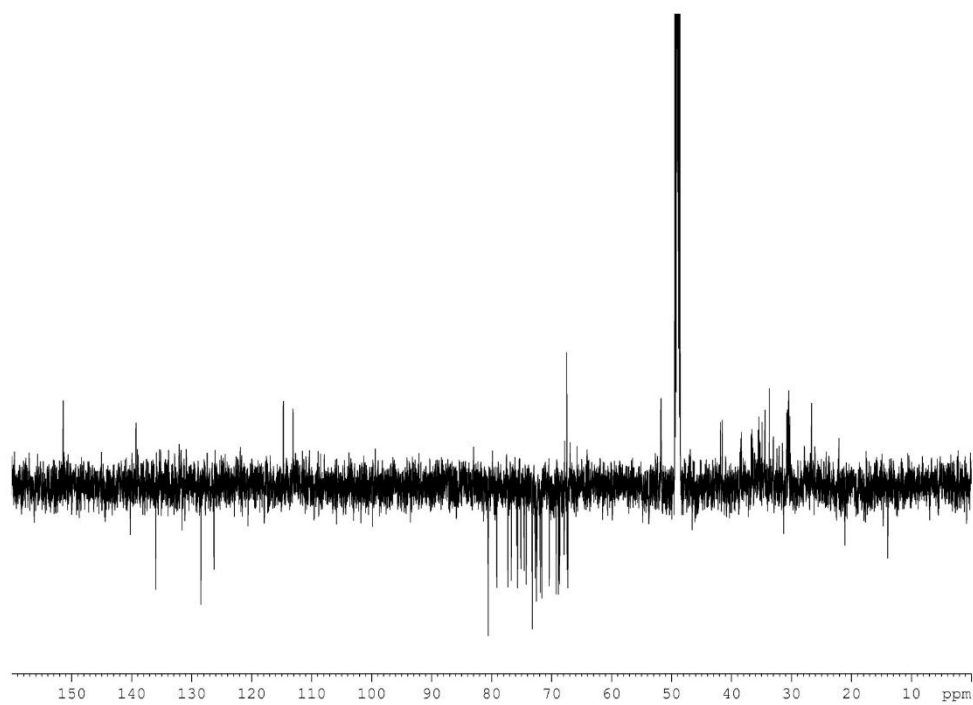

**Figure S10.** <sup>13</sup>C Jmod spectrum (600 MHz, CD<sub>3</sub>OD) of 2.

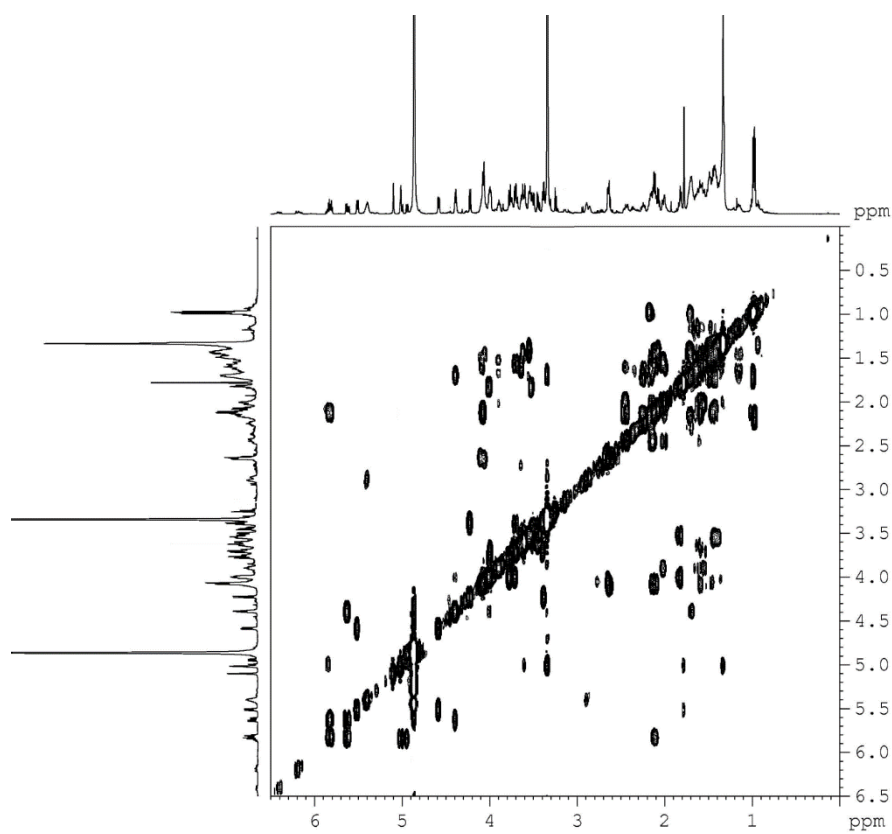

Figure S11.  $^1\text{H}$ - $^1\text{H}$  COSY spectrum (600 MHz,  $\text{CD}_3\text{OD}$ ) of **2**.

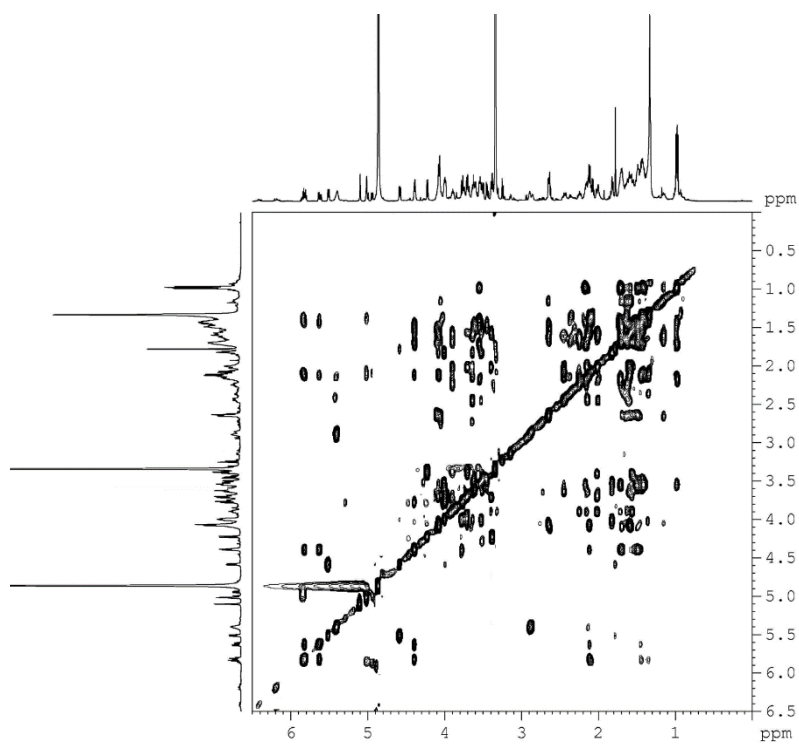

Figure S12. TOCSY spectrum (600 MHz,  $\text{CD}_3\text{OD}$ ) of **2**.

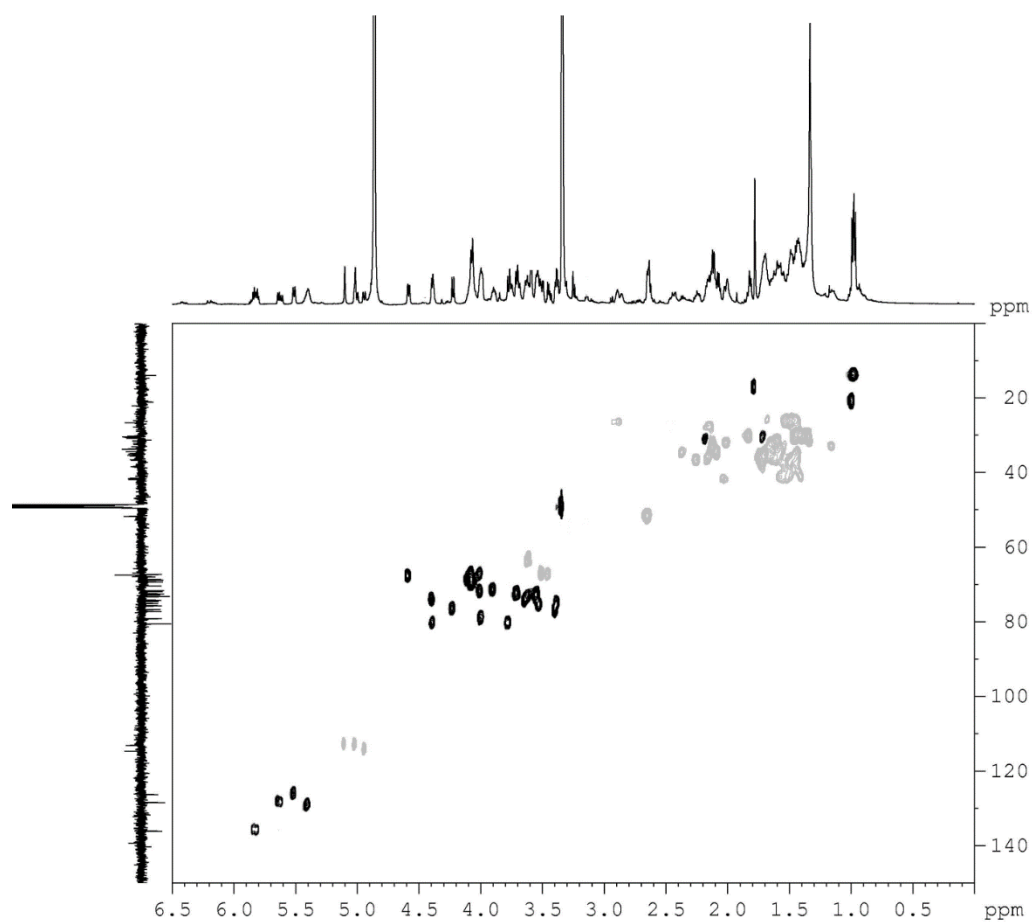

Figure S13. edHSQC spectrum (600 MHz, CD<sub>3</sub>OD) of **2**.

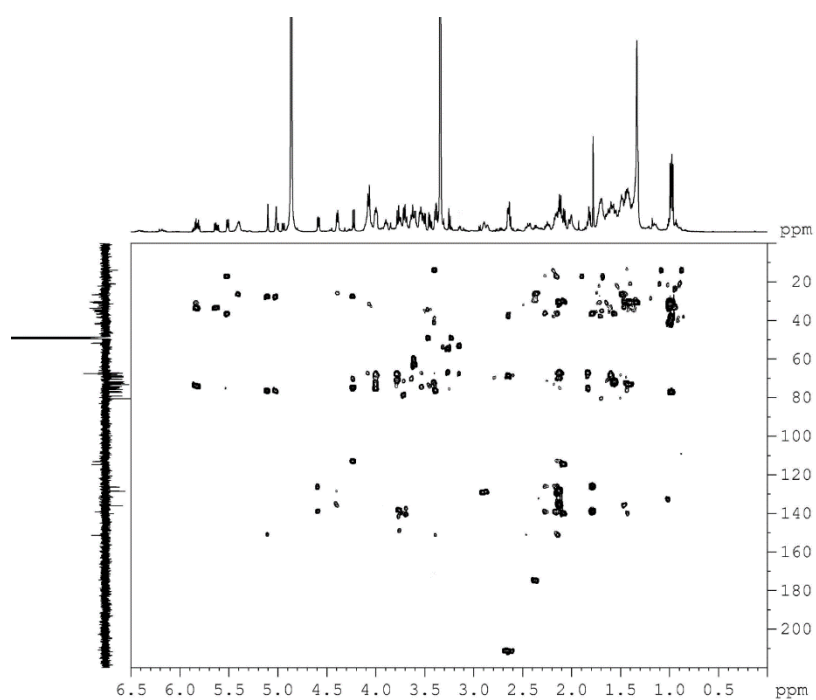

Figure S14. HMBC ( $J = 7$  Hz) spectrum in CD<sub>3</sub>OD (600 MHz) of **2**.



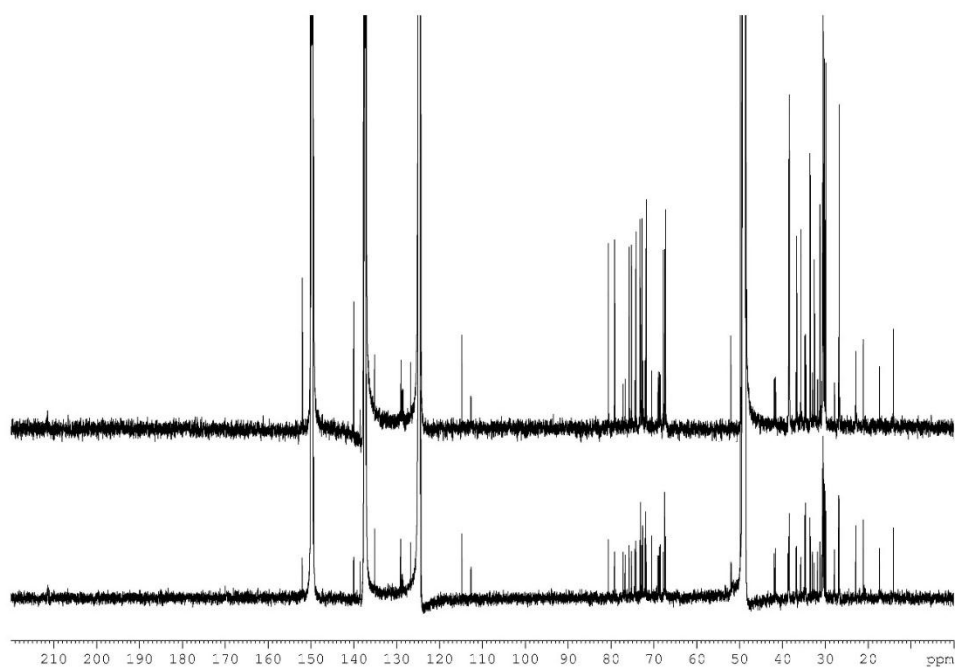

**Figure S15.** <sup>13</sup>C NMR spectrum (600 MHz, CD<sub>3</sub>OD/C<sub>5</sub>D<sub>5</sub>N 2:1) of **1** from the experiment with [1-<sup>13</sup>C]-acetate (upper) in comparison with the natural compound (lower).

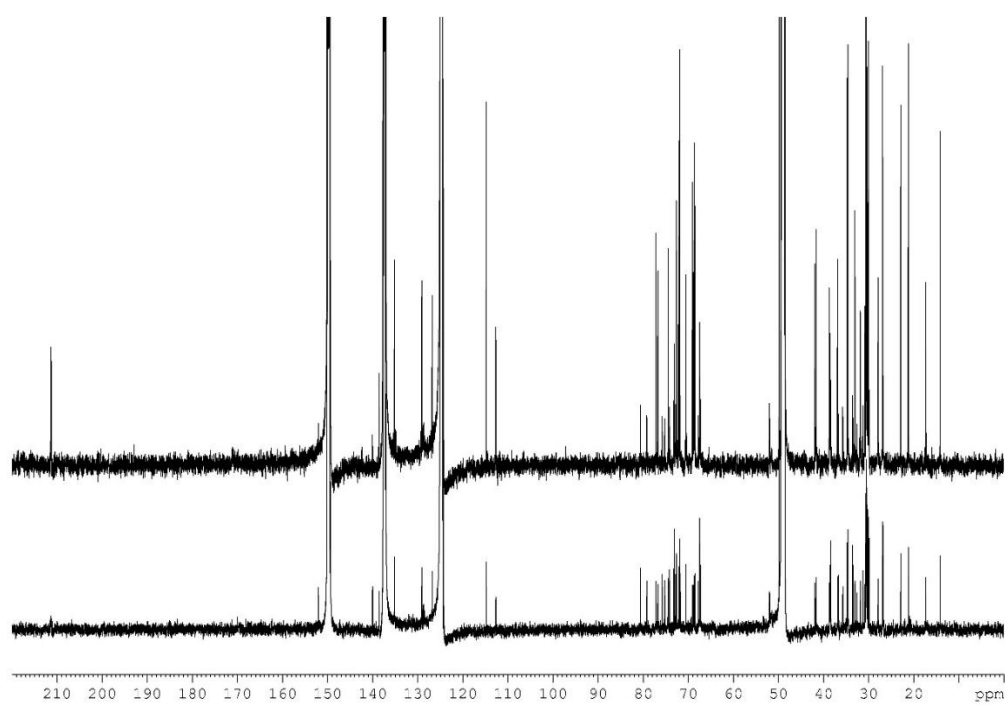

**Figure S16.** <sup>13</sup>C NMR spectrum (600 MHz, CD<sub>3</sub>OD/C<sub>5</sub>D<sub>5</sub>N 2:1) of **1** from the experiment with [2-<sup>13</sup>C]-acetate (upper) in comparison with the natural compound (lower).

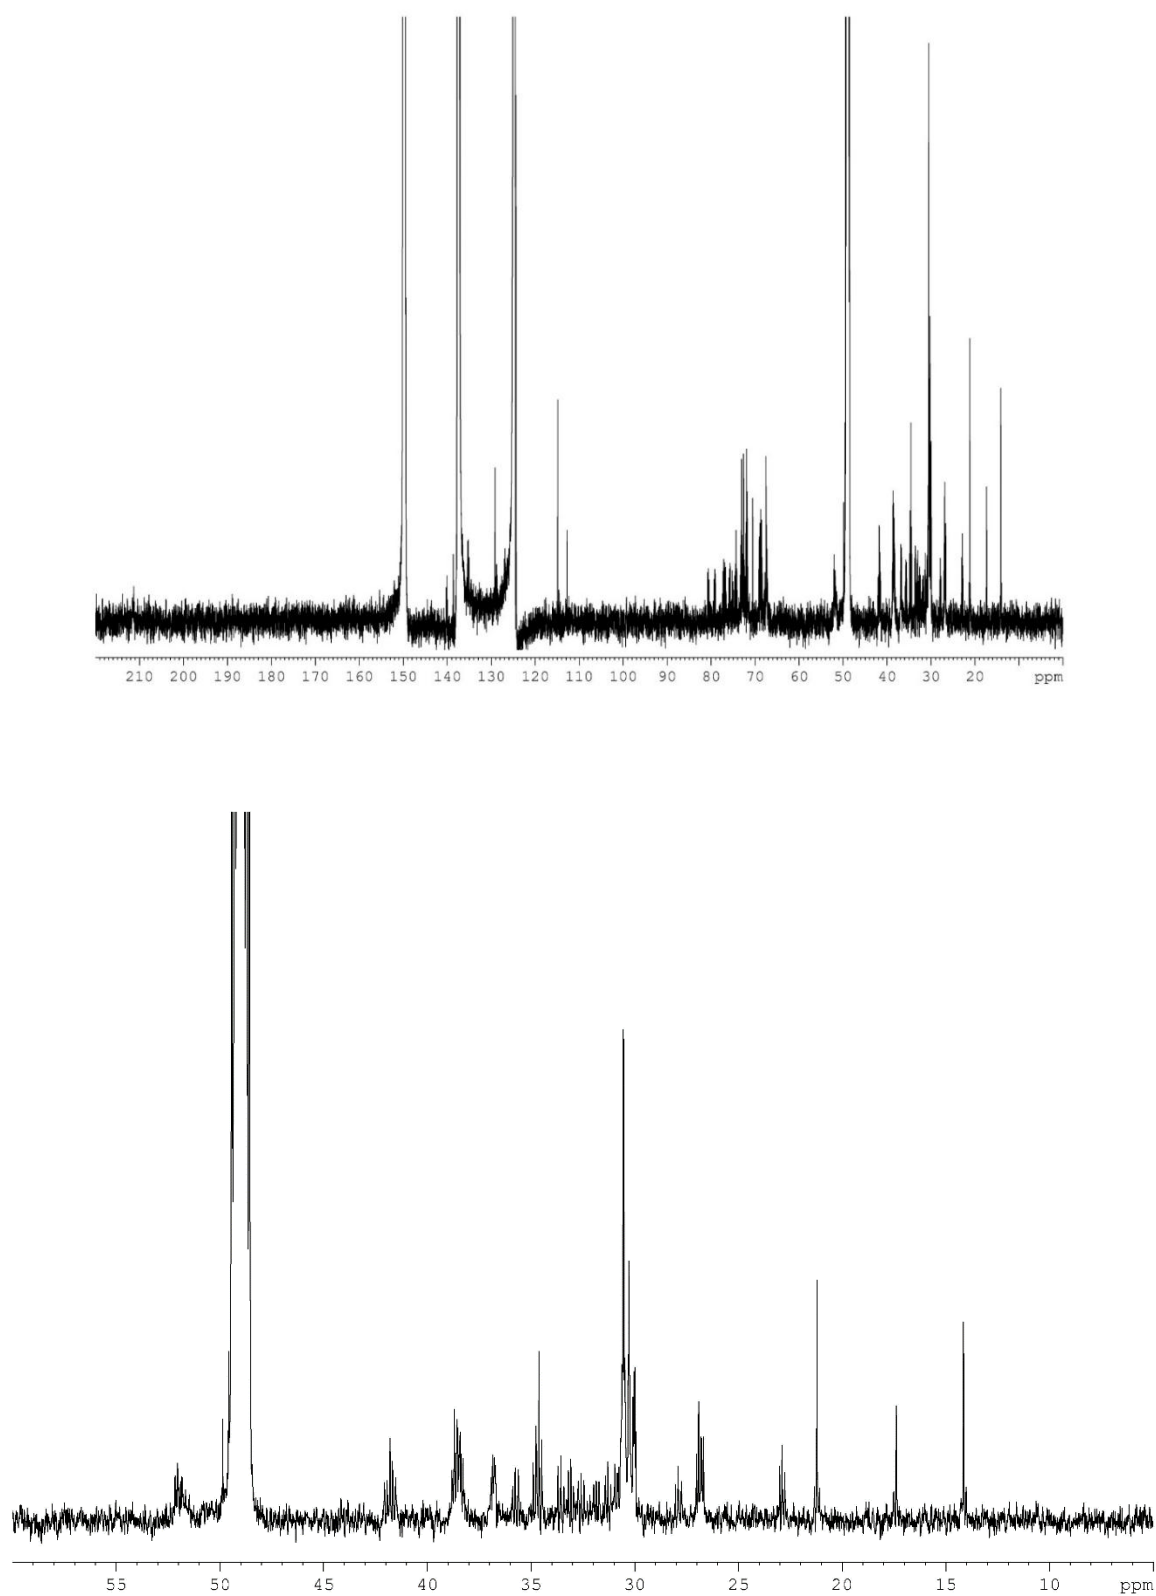

**Figure S17.** Two enlargements of  $^{13}\text{C}$  NMR spectrum (600 MHz,  $\text{CD}_3\text{OD}/\text{C}_5\text{D}_5\text{N}$  2:1) of **1** from the experiment with  $[1,2-^{13}\text{C}_2]$ -acetate.

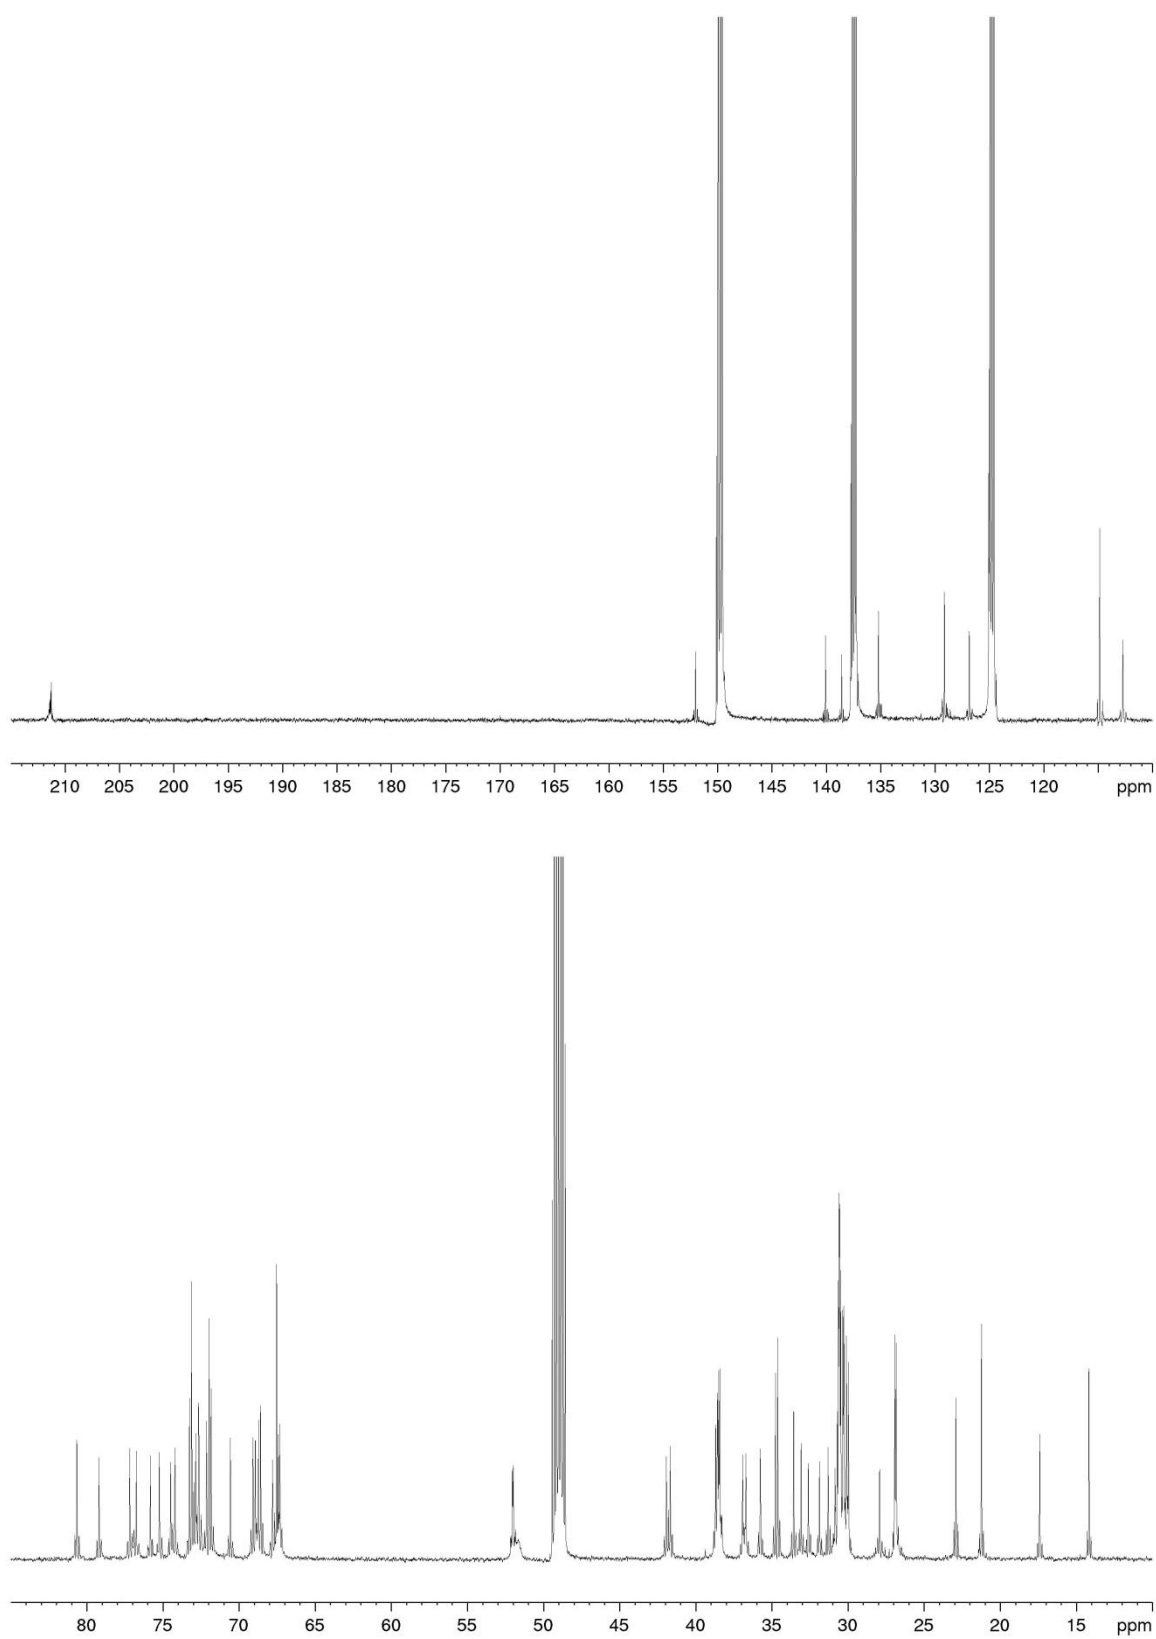

**Figure S18.** Two enlargements of  $^{13}\text{C}$  NMR spectrum (600 MHz,  $\text{CD}_3\text{OD}/\text{C}_5\text{D}_5\text{N}$  2:1) of **1** from the experiment with  $[1-^{13}\text{C}]$ -glycolate.

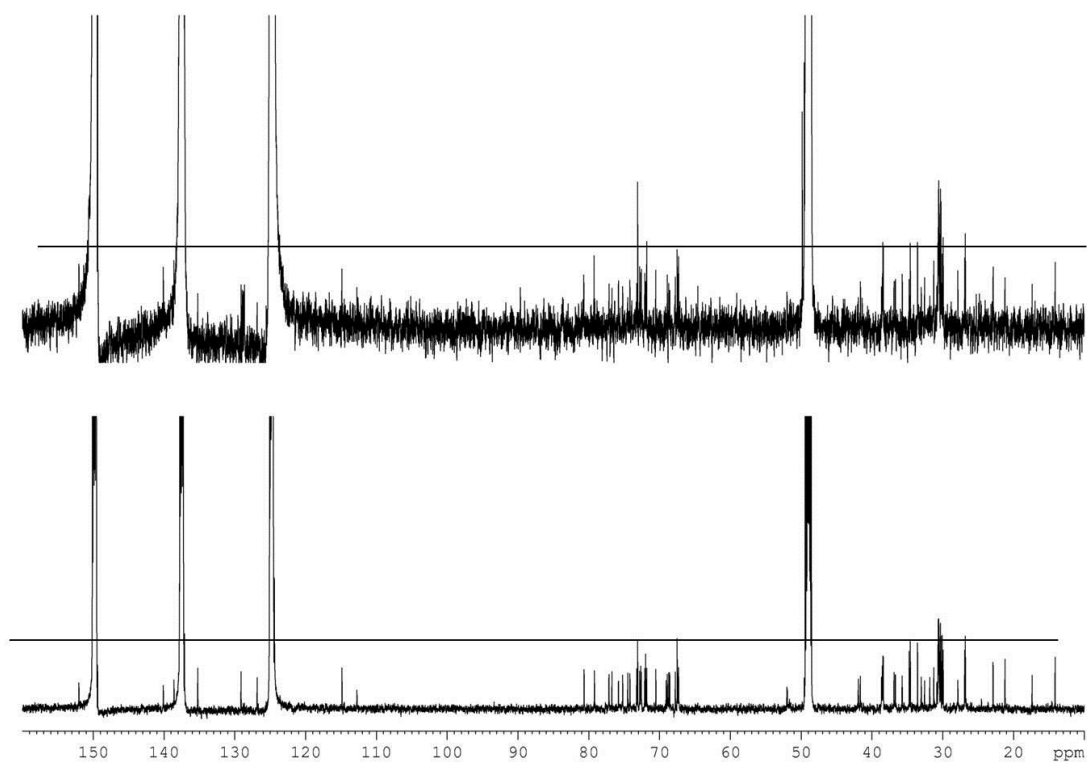

**Figure S19.** <sup>13</sup>C NMR spectrum (600 MHz, CD<sub>3</sub>OD/C<sub>5</sub>D<sub>5</sub>N 2:1) of **1** from the experiment with [1-<sup>13</sup>C]-glycolate/SHAM (upper) in comparison with the natural compound (lower).

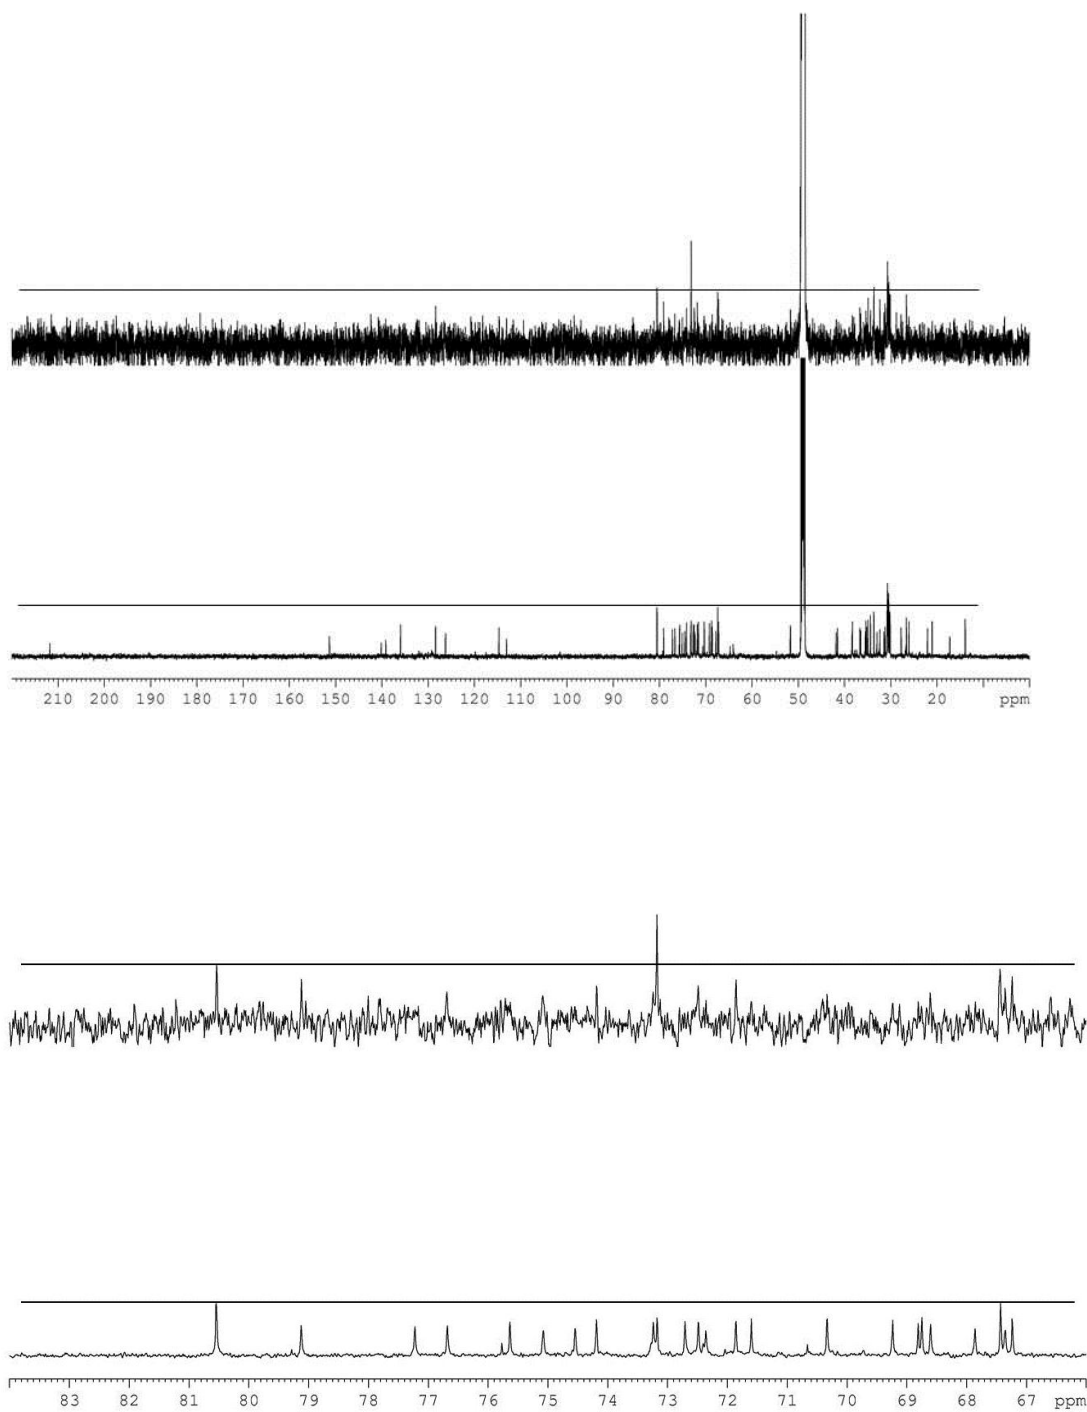

**Figure S20.** Two enlargements of  $^{13}\text{C}$  NMR spectrum (600 MHz,  $\text{CD}_3\text{OD}$ ) of 2 from the experiment with [1- $^{13}\text{C}$ ]-glycolate/SHAM (upper) in comparison with the natural compound (lower).

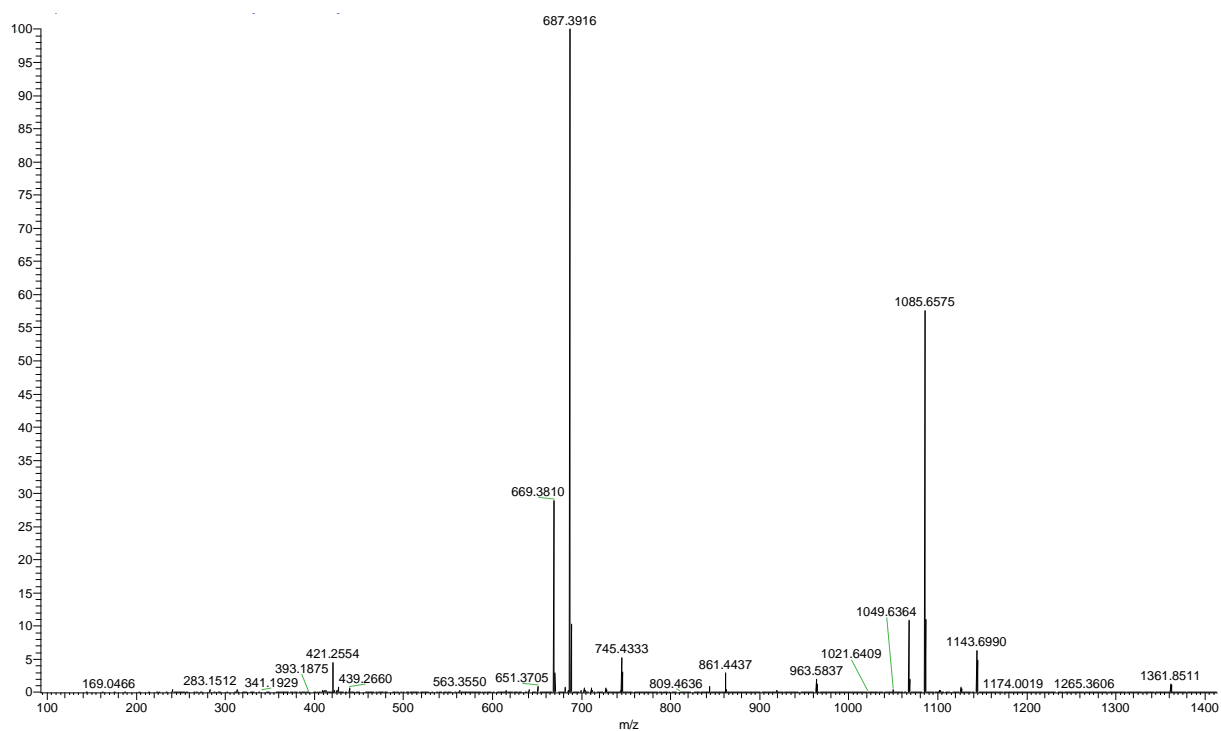

Figure S21. ESI<sup>+</sup> MS/MS of 1 on molecular ion sodium adduct [M+Na]<sup>+</sup> at *m/z* 1361.8.

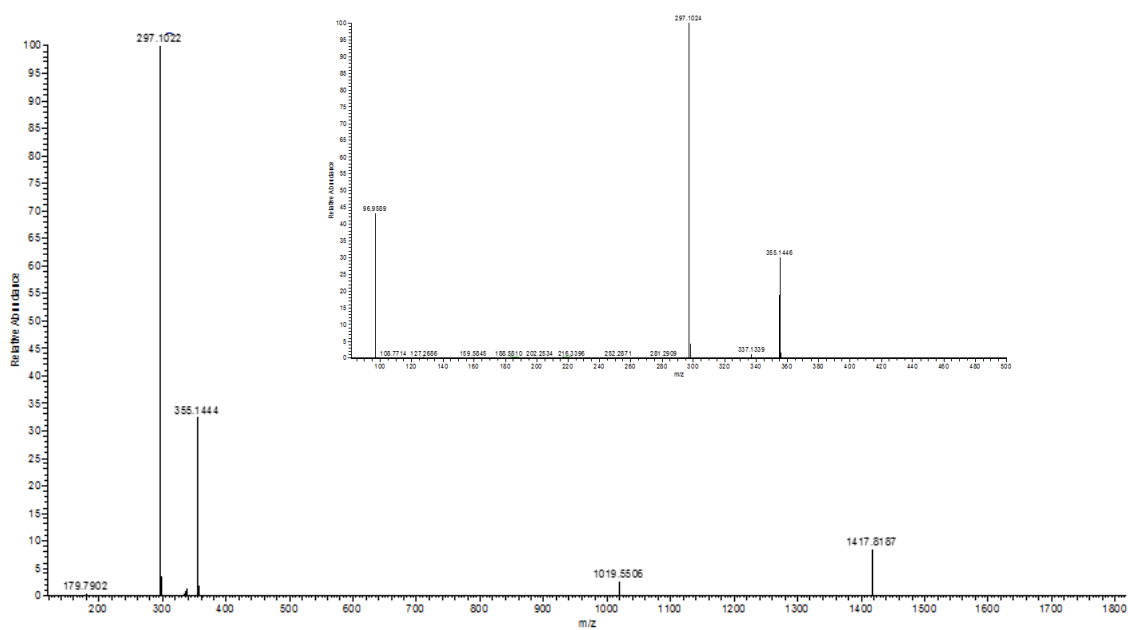

Figure S22. ESI<sup>-</sup> MS/MS of 2 on molecular ion [M-H]<sup>-</sup> at *m/z* 1417.8.

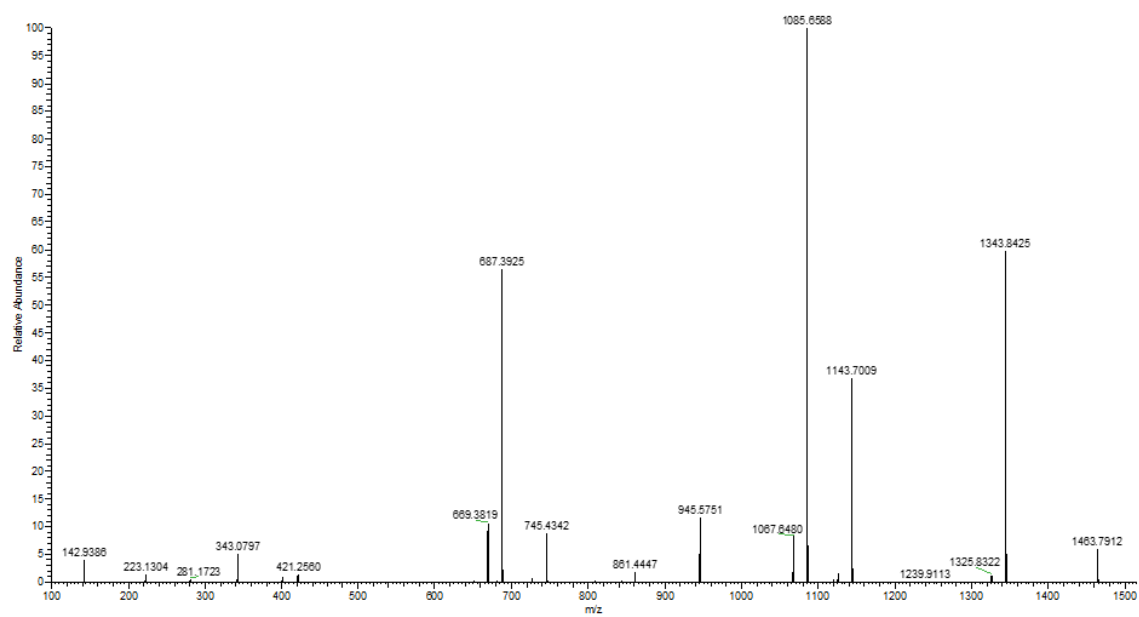

**Figure S23.** ESI<sup>+</sup> MS/MS of 2 on molecular ion sodium adduct [M-H+2Na]<sup>+</sup> at *m/z* 1463.8.
